# Supplementary material
Source: PubMed Central journal article supplement (PMC3794437)

## *MLH1* methylation levels detected by qMSP in YT pedigree

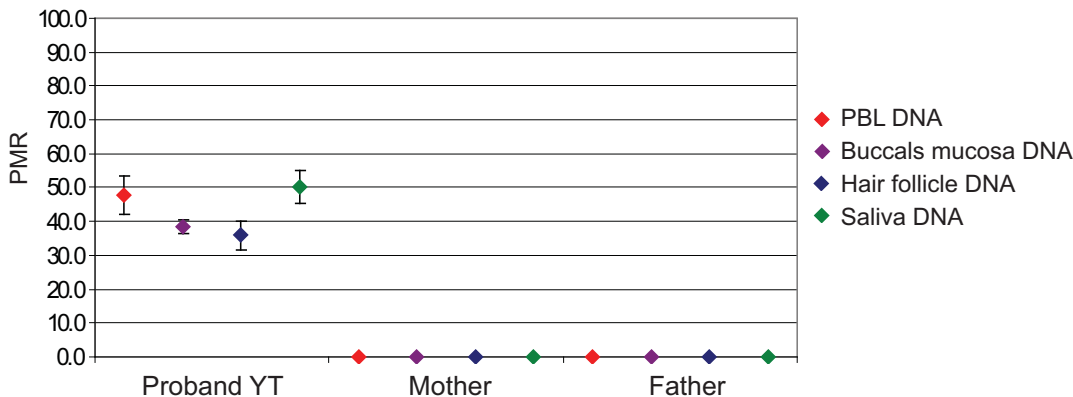

**A** Immunohistochemistry of the mismatch repair proteins in the colorectal tumour of Proband BF

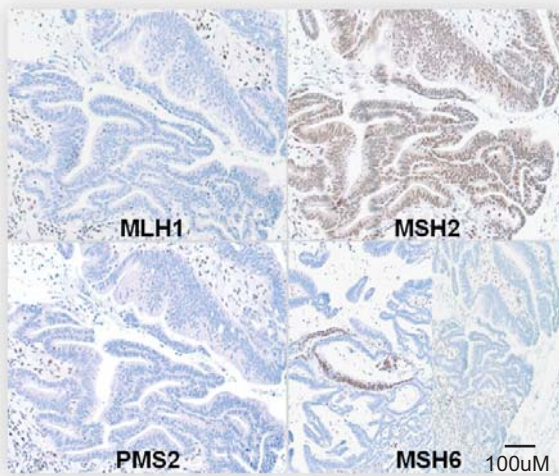

**B** *MLH1* methylation levels detected in lymphoblastoid cells by qMSP in BF pedigree

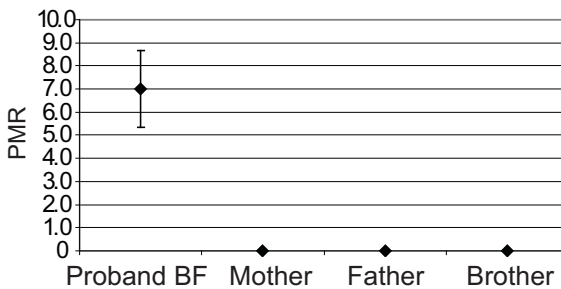

**C** *MLH1* methylation status in BF and family by bisulphite pyrosequencing

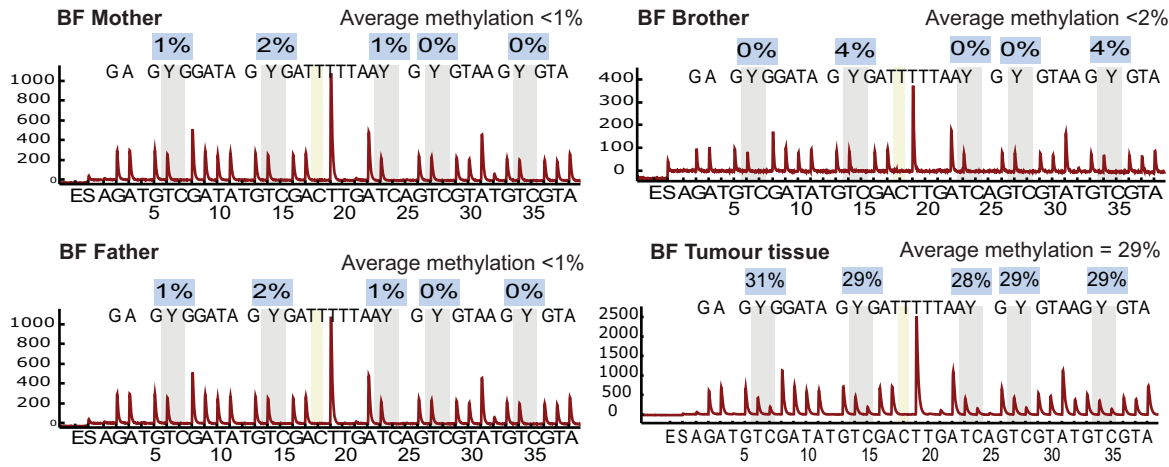

A Retention of heterozygosity at the *MLH1* c.A655G SNP in tumours from Patient A

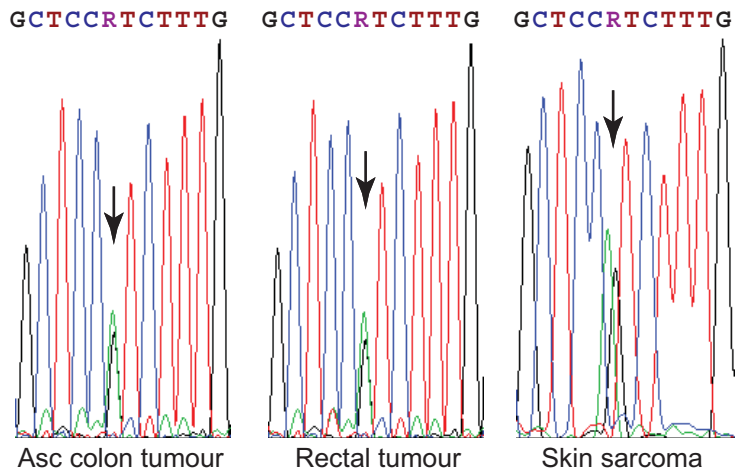

B Allelic methylation of *MLH1* C-region in Patient A

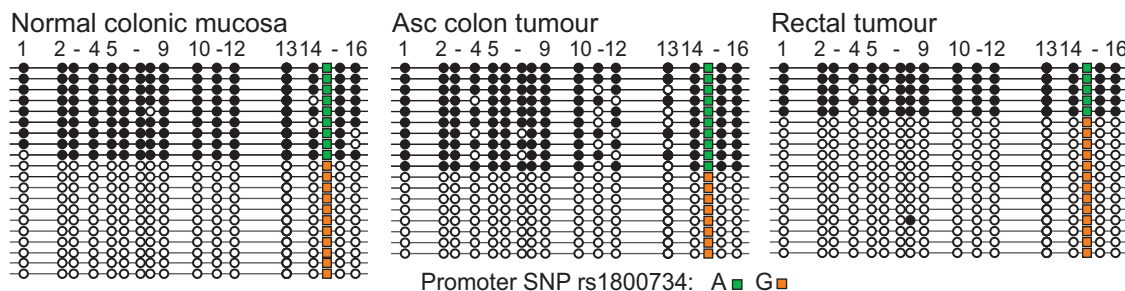

Supplement: NIHMS517877-supplement-Supp_files.pdf [file NIHMS517877-supplement-Supp_files.pdf]
